# Supplementary material
Source: publisher figshare collection journal article supplement (https://acs.figshare.com/ndownloader/files/22007568)
Supplement: Supplementary file 1 [file 22007568]

## Sheet: Sheet1
Table S15. Supplemental data for stain-free Western blot
Name	Catalog/Company	Expected MW (kDa)	Clonality	Concentration	Proteomics results								Western blot results
					DPP vs. FP	p value$	GC vs. DPP	p value#	GC vs. MAP	p value#	DPP vs. MAP	p value#
Anti-HMGB1	sc-135809/Santa Cruz	30	Mouse M	0.5 μg/ml	Unique in GC								Consistent with proteomics result
Anti-PRELP	ab229719/abcam	55	Rabbit P	1.9 μg/ml	0.38	0.15	0.05	0.00127	0.71	0.99	14.03	0.00142	Consistent with proteomics result
Anti-CSRP1	ab175319/abcam	21	Rabbit P	3.14 μg/ml	3.51	0.00112	0.71	0.0997	1.26	0.46	1.79	0.0214	Consistent with proteomics result except GC vs. MAP with significant downregulation
Anti-YWHAB/Z*	ab12347/abcam	29	Mouse M	1 μg/ml	1.03	0.94	2.67	0.00564	2.32	0.00898	0.87	0.89	Consistent with proteomics result
					1.33	0.2	2.83	0.00111	3.19	0.000802	1.13	0.91	Consistent with proteomics result
Anti-NPM1	sc-53175/Santa Cruz	40	Mouse M	0.4 μg/ml	Not found		12.7	0.00118	10.07	0.00133	0.79	0.99	Consistent with proteomics result
Anti-CALR	ab15607/abcam	60	Rabbit P	≤9 μg/ml	1.85	0.29	8.04	0.000694	5.29	0.00105	0.66	0.85	Consistent with proteomics result except GC vs. MAP with insignificant upregulation
Anti-CTNNB1	ab32572/abcam	92	Rabbit M	0.0126 μg/ml	A predicted upregulated upstream regulator in GC								Consistent with IPA prediction
Note: $, p value from t test; #, p value from Tukey's multiple comparison analysis testing in one-way ANOVA; *, the first row refers to YWHAB, and second YWHAZ. In clonality column, M means monoclonal and P means polyclonal.
